# Supplementary material for: Severe Infection in Anti-Glomerular Basement Membrane Disease: A Retrospective Multicenter French Study
Source: MDPI journal article supplement (doi:10.3390/jcm9030698), 2020-03-04
Supplement: s1 [file s1]

**Supplemental Table 2: Causes of death within the first 3 years of follow-up**

| Age  | Time interval<br>(months) | Cause                         | Specific cause                                      |
|------|---------------------------|-------------------------------|-----------------------------------------------------|
| 77   | 0.43                      | <b>Infection</b>              | <i>S. aureus</i> septic shock                       |
| 72   | 0.57                      | <b>Cardiovascular</b>         | Subarachnoid hemorrhage                             |
| 56   | 0.77                      | <b>Infection + vasculitis</b> | Infected diffuse alveolar hemorrhage (ARDS)         |
| 89   | 1.13                      | <b>Infection</b>              | Methicillin-resistant <i>S. aureus</i> septic shock |
| 88   | 1.20                      | <b>Treatment limitation</b>   | Discontinuation of dialysis                         |
| 86   | 1.47                      | <b>Malignancy</b>             | Lung and prostate cancer                            |
| 79   | 1.90                      | <b>Infection</b>              | <i>S. aureus</i> septic shock                       |
| 66   | 2.23                      | <b>Cardiovascular</b>         | Cerebellar hemorrhagic stroke                       |
| 38   | 2.57                      | <b>Cardiovascular</b>         | Undetermined cardiac arrest.                        |
| 76   | 2.57                      | <b>Infection + vasculitis</b> | Infected diffuse alveolar hemorrhage (ARDS)         |
| 78,5 | 2.63                      | <b>Infection</b>              | Hemorrhagic and septic shock                        |
| 80   | 3.20                      | <b>Cardiovascular</b>         | Ventricular rhythm disorder                         |
| 67   | 3.53                      | <b>Infection</b>              | Herpes simplex encephalitis                         |
| 82   | 5.17                      | <b>Treatment limitation</b>   | Discontinuation of dialysis                         |
| 83   | 5.90                      | <b>Infection</b>              | Pulmonary septic shock.                             |
| 47   | 7.23                      | <b>Cardiovascular</b>         | Extensive ischemic stroke                           |
| 77   | 10.17                     | <b>Treatment limitation</b>   | Discontinuation of dialysis                         |
| 20   | 11.13                     | <b>Metabolic</b>              | Hyperkalemia                                        |
| 82   | 12.73                     | <b>Malignancy</b>             | Metastatic colon cancer                             |
| 52   | 15.93                     | <b>Infection</b>              | Septic shock                                        |
| 42   | 19.37                     | <b>Cardiovascular</b>         | Congestive heart failure                            |
| 88   | 21.97                     | <b>Infection</b>              | Gut-derived septic shock                            |
| 59   | 30.13                     | <b>Malignancy</b>             | Colon cancer                                        |
| 67   | 30.50                     | <b>Cardiovascular</b>         | Acute coronary syndrome                             |
| 67   | 32.63                     | <b>Cardiovascular</b>         | Ventricular rhythm disorder                         |

Values are expressed as number. *S. aureus* : *Staphylococcus aureus*, ARDS: acute respiratory distress syndrome
