# Supplementary material for: Severe Infection in Anti-Glomerular Basement Membrane Disease: A Retrospective Multicenter French Study
Source: MDPI journal article supplement (doi:10.3390/jcm9030698), 2020-03-04
Supplement: s1 [file s1]

**Supplemental Table 1. Patient characteristics based on ANCA status**

|                                         | <b>Total</b><br>(n=201) | <b>ANCA positive</b><br>(n=54) | <b>ANCA negative</b><br>(n=147) | <b>p-value</b> |
|-----------------------------------------|-------------------------|--------------------------------|---------------------------------|----------------|
| Age                                     | 53 [30–71]              | 70 [56-76]                     | 46 [26–64]                      | <0.0001        |
| Male                                    | 114 (57)                | 30 (56)                        | 84 (57)                         | 0.84           |
| <b>Comorbidities</b>                    |                         |                                |                                 |                |
| <b>Charlson Comorbidity Index</b>       | 0 [0–1]                 | 1 [0-1]                        | 0 [0-1]                         | <0.0001        |
| <b>Performance Status</b>               | 1 [1–2]                 | 2 [1-2]                        | 1 [1-2]                         | 0.002          |
| Tobacco use                             | 85 (42)                 | 13 (24)                        | 72 (49)                         | 0.002          |
| <b>Kidney involvement</b>               |                         |                                |                                 |                |
| Oligoanuria                             | 128 (64)                | 40 (74)                        | 88 (60)                         | 0.06           |
| Peak SCr (μmol/L)                       | 655 [362–1044]          | 859 [549-1242]                 | 585 [288-977]                   | 0.003          |
| Needed dialysis at initial presentation | 149 (74)                | 46 (85)                        | 103 (70)                        | 0.03           |
| <b>Kidney biopsy findings</b>           | 180 (90)                | 46 (85)                        | 134 (91)                        | 0.22           |
| -Focal                                  | 16 (9)                  | 0 (0)                          | 16 (12)                         | 0.01           |
| -Cellular                               | 116 (65)                | 28 (61)                        | 88 (66)                         | 0.56           |
| -Fibrous                                | 35 (19)                 | 14 (30)                        | 21 (15)                         | 0.03           |
| -Mixed                                  | 13 (7)                  | 4 (9)                          | 9 (7)                           | 0.66           |
| <b>Lung involvement</b>                 |                         |                                |                                 |                |
| Alveolar hemorrhage                     | 74 (37)                 | 18 (33)                        | 56 (38)                         | 0.54           |
| Hypoxemic respiratory failure           | 37 (18)                 | 6 (11)                         | 31 (21)                         | 0.11           |
| <b>Inflammatory markers</b>             |                         |                                |                                 |                |
| Serum albumin (g/L)                     | 26.2 [23.0–30.0]        | 26 [22.4–30.0]                 | 26.6 [23.0–30.0]                | 0.53           |
| Leukocytes (cells/mm <sup>3</sup> )     | 11.0 [8.1–13.3]         | 11.5 [8.0–13.4]                | 10.7 [8.1–12.8]                 | 0.61           |
| Hemoglobin (g/dL)                       | 8.6 [7.5–9.9]           | 9 [7.7–10.3]                   | 8.4 [7.4–9.7]                   | 0.06           |
| C-reactive protein (mg/L)               | 102 [33–170]            | 110 [54–169]                   | 98 [25–172]                     | 0.19           |
| <b>Therapeutic management</b>           |                         |                                |                                 |                |
| Standard therapy                        | 137 (68)                | 31 (57)                        | 106 (72)                        | 0.048          |
| Therapy M6                              | 115 (62*)               | 28 (57*)                       | 87 (64*)                        | 0.53           |
| Therapy M12                             | 43 (24#)                | 11 (23#)                       | 32 (25#)                        | 0.83           |
| <b>Co-trimoxazole prophylaxis</b>       | 138 (69)                | 39 (72)                        | 99 (67)                         | 0.51           |
| <b>Severe infections §</b>              | 116 (58)                | 40 (74)                        | 76 (52)                         | 0.0045         |
| <b>Septic shock</b>                     | 29 (25\$)               | 10 (25\$)                      | 19 (25\$)                       | 1              |

Values are expressed as median [interquartile range] or number (percent). Anti-GBM, anti-glomerular basement membrane antibodies; ANCA, anti-neutrophil cytoplasmic antibodies; MPO, myeloperoxidase; PR3, proteinase 3; SCr, serum creatinine; Standard therapy defined as the association of corticosteroid (CST)+ plasma exchange (PLEX)+cyclophosphamide (CYC) and/or Rituximab (RTX). \* reported as a percentage of patient alive (n=185 with 49 ANCA positive and 136 ANCA negative). # reported as a percentage of patient alive (n=177 with 48 ANCA positive and 129 ANCA negative). § number of patients presented at least one serious infection during the first year. \$ reported as a percentage of the number of patients.
